# Supplementary material
Source: PubMed Central journal article supplement (PMC8504618)
Supplement: btab333_supplementary_data.pdf [file btab333_supplementary_data.pdf]

# Supplemental Information for “Study of Real-Valued Distance Prediction For Protein Structure Prediction with Deep Learning”

Jin Li<sup>2,1</sup>, Jinbo Xu<sup>1,\*</sup>

1. Toyota Technological Institute at Chicago; 2. Department of Computer Science, University of Chicago

\* Please address correspondence to Dr. Jinbo Xu at [jinboxu@gmail.com](mailto:jinboxu@gmail.com)

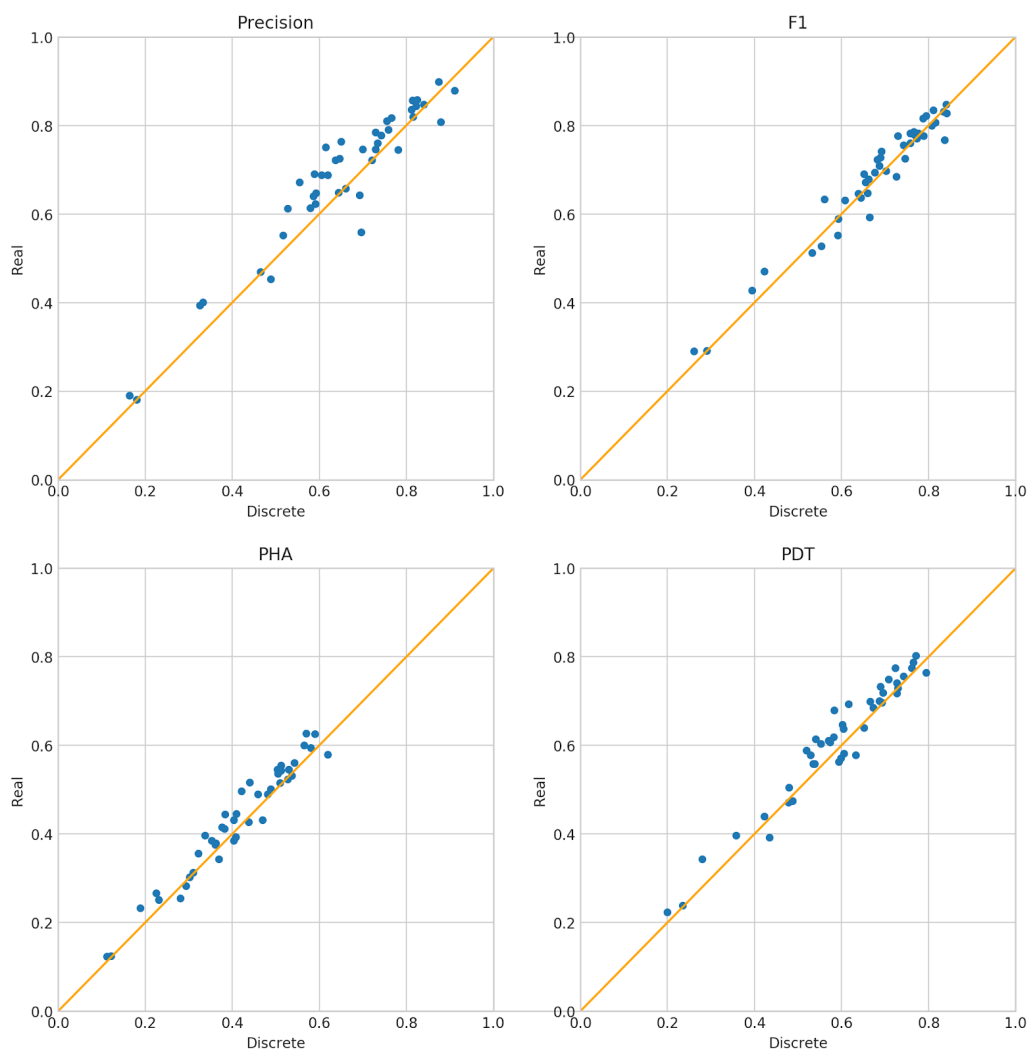

Figure S1. Distance prediction accuracy of our discrete-valued and real-valued method on the 43 FM and FM/BM CASP13 targets. The accuracy is evaluated by precision, F1, PHA and PDT.

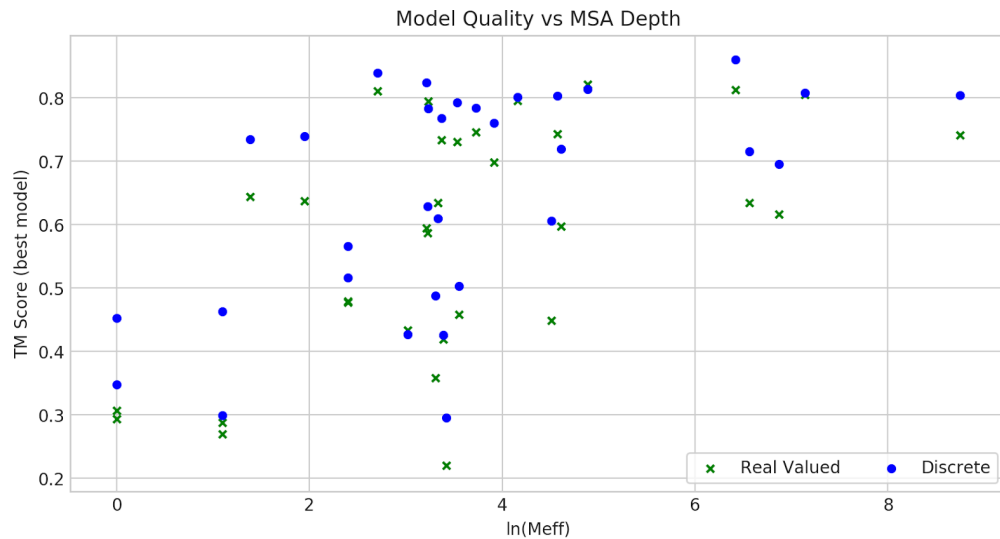

Figure S2. The relationship between the logarithm of MSA depth (i.e.,  $\ln(\text{Meff})$ ) and 3D model quality on the 32 CASP13 FM targets.

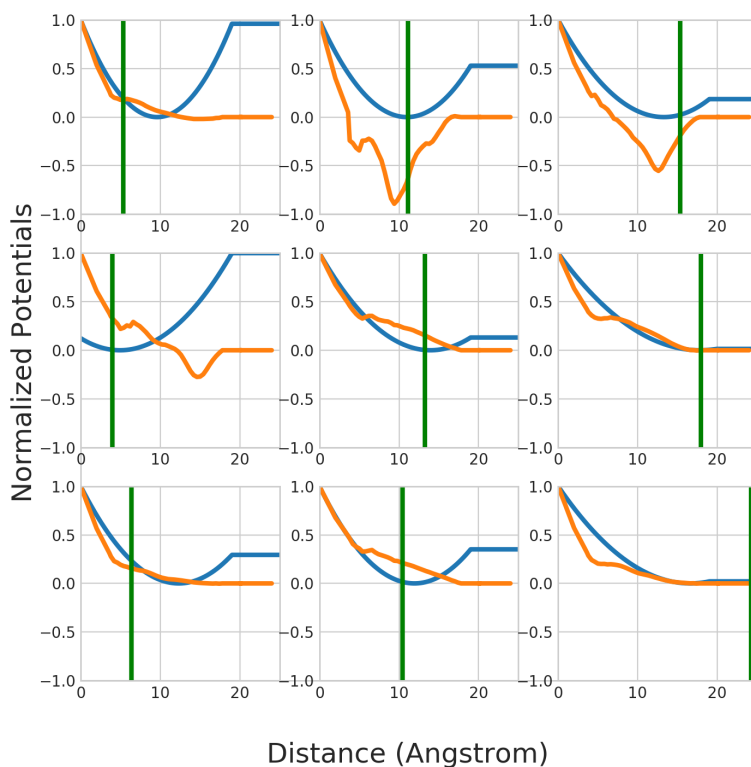

Figure S3. Comparison of predicted distance potentials on one target T1015s1-D1 for short-range (top row), medium-range (middle row), and long-range (last row) residue pairs. Columns correspond to  $< 8\text{\AA}$ ,  $8-15\text{\AA}$ , and  $> 15\text{\AA}$ . The green line marks the native distance of a residue pair; the blue line corresponds to real-valued prediction and the orange line to discrete-valued prediction.
